# Supplementary material
Source: PubMed Central journal article supplement (PMC6233649)

## Supplementary Online Content

Goel R, Patel EU, Cushing MM, et al. Association of perioperative red blood cell transfusions with venous thromboembolism in a large North American Registry. *JAMA Surg*. Published online June 13, 2018. doi:10.1001/jamasurg.2018.1565

**eTable 1.** Univariate and Multivariable Analysis of Factors Associated With the Development of VTE Within 30 Days Postoperatively in Patients Undergoing Surgical Procedures

**eTable 2.** Sensitivity Analysis of the Association Between Perioperative Red Blood Cell Transfusion and the Development of Postoperative VTE Within 30 Days of a Surgical Procedure Using Multiple Imputation With Chained Equations

**eTable 3.** Characteristics of Participants in the Full Sample and the Propensity-Matched Subsample by Perioperative Red Blood Cell Transfusion Status

**eTable 4.** Association of Perioperative Red Blood Cell Transfusion and the Development of VTE Within 30 Days Postoperatively in Propensity-Matched Patient Groups Undergoing Surgical Procedures

**eFigure.** Schema of Participants in the Original Sample and the Propensity-Matched Subsample

This supplementary material has been provided by the authors to give readers additional information about their work.

**eTable 1.** Univariate and Multivariable Analysis of Factors Associated With the Development of VTE Within 30 Days Postoperatively in Patients Undergoing Surgical Procedures

| Explanatory Variable                             | No. Patients<br>(N=750 937) | %   | OR (95%CI)    | AOR (95% CI)  |
|--------------------------------------------------|-----------------------------|-----|---------------|---------------|
| <b>Perioperative RBC Transfusion</b>             |                             |     |               |               |
| No                                               | 703,527                     | 0.7 | Ref.          | Ref.          |
| Yes                                              | 47,410                      | 3.4 | 5.2 (4.9-5.5) | 2.1 (2.0-2.3) |
| <b>Age (per 10 years)</b>                        | 750,937                     | -   | 1.3 (1.3-1.3) | 1.1 (1.1-1.1) |
| <b>Sex</b>                                       |                             |     |               |               |
| Female                                           | 426,727                     | 0.8 | Ref.          | Ref.          |
| Male                                             | 324,209                     | 0.9 | 1.2 (1.1-1.3) | 1.1 (1.1-1.2) |
| <b>Race</b>                                      |                             |     |               |               |
| White                                            | 551,935                     | 0.9 | Ref.          | Ref.          |
| Black or African American                        | 75,885                      | 1.0 | 1.2 (1.1-1.3) | 1.1 (1.0-1.2) |
| Asian                                            | 21,081                      | 0.4 | 0.5 (0.4-0.6) | 0.5 (0.4-0.7) |
| Other                                            | 8,494                       | 0.4 | 0.5 (0.4-0.7) | 0.6 (0.4-0.8) |
| <b>Body Mass Index</b>                           |                             |     |               |               |
| Underweight                                      | 12,357                      | 1.1 | 1.5 (1.2-1.8) | 1.0 (0.8-1.2) |
| Normal weight                                    | 179,533                     | 0.7 | Ref.          | Ref.          |
| Overweight                                       | 230,320                     | 0.8 | 1.1 (1.0-1.2) | 1.2 (1.1-1.3) |
| Class 1 Obesity                                  | 155,134                     | 0.9 | 1.2 (1.1-1.3) | 1.4 (1.3-1.5) |
| Class 2 Obesity                                  | 81,949                      | 0.9 | 1.2 (1.1-1.3) | 1.4 (1.3-1.6) |
| Class 3 Obesity                                  | 76,632                      | 0.9 | 1.2 (1.1-1.3) | 1.5 (1.3-1.6) |
| <b>Functional Health Status Prior to Surgery</b> |                             |     |               |               |
| Independent                                      | 726,360                     | 0.8 | Ref.          | Ref.          |
| Partially dependent                              | 16,006                      | 2.1 | 2.6 (2.4-3.0) | 1.2 (1.1-1.4) |
| Totally dependent                                | 3,184                       | 2.3 | 2.9 (2.3-3.7) | 1.1 (0.9-1.5) |
| <b>ASA Class</b>                                 |                             |     |               |               |

|                                  |         |     |                  |               |
|----------------------------------|---------|-----|------------------|---------------|
| 1-No Disturbance                 | 69,685  | 0.2 | Ref.             | Ref.          |
| 2-Mild Disturbance               | 337,688 | 0.5 | 2.3 (1.9-2.7)    | 1.1 (0.9-1.3) |
| 3-Severe Disturbance             | 296,037 | 1.2 | 5.3 (4.5-6.2)    | 1.3 (1.1-1.6) |
| 4-Life Threatening               | 44,179  | 2.2 | 10.3 (8.7-12.2)  | 1.6 (1.3-1.9) |
| 5-Moribund                       | 1,343   | 4.4 | 20.9 (15.4-28.3) | 1.7 (1.1-2.4) |
| <b>Hospital Length of Stay</b>   |         |     |                  |               |
| 0-1 day                          | 372,952 | 0.2 | Ref.             | Ref.          |
| ≥2 days                          | 377,369 | 1.5 | 7.8 (7.2-7.8)    | 4.0 (3.6-4.4) |
| <b>Concurrence Sepsis</b>        |         |     |                  |               |
| No                               | 737,630 | 0.8 | Ref.             | Ref.          |
| Yes                              | 13,307  | 4.6 | 6.1 (5.6-6.7)    | 3.1 (2.9-3.4) |
| <b>Ventilator Dependence</b>     |         |     |                  |               |
| No                               | 748,380 | 0.8 | Ref.             | Ref.          |
| Yes                              | 2,557   | 6.3 | 8.2 (7.0-9.6)    | 2.5 (2.0-3.0) |
| <b>Disseminated Cancer</b>       |         |     |                  |               |
| No                               | 733,087 | 0.8 | Ref.             | Ref.          |
| Yes                              | 17,850  | 3.3 | 4.4 (4.0-4.8)    | 2.1 (2.0-2.4) |
| <b>Work Relative Value Units</b> |         |     |                  |               |
| Quartile 1                       | 188,666 | 0.3 | Ref.             | Ref.          |
| Quartile 2                       | 191,609 | 0.4 | 1.3 (1.2-1.4)    | 1.0 (0.9-1.1) |
| Quartile 3                       | 185,945 | 1.0 | 3.1 (2.8-3.4)    | 1.4 (1.2-1.5) |
| Quartile 4                       | 184,717 | 1.6 | 5.0 (4.6-5.4)    | 1.7 (1.5-1.9) |

The multivariable model was limited to 642,946 patients (complete-cases) and was adjusted for age, sex, race, body mass index, functional health status prior to surgery, the American Society of Anesthesiology (ASA) severity class, hospital length of stay, occurrence of sepsis, mechanical ventilation dependence, disseminated cancer, and work-related relative value units (as a surrogate for complexity of surgery).

Abbreviations: OR, odds ratio, adjOR, adjusted odds ratio, CI, confidence interval

**eTable 2.** Sensitivity Analysis of the Association Between Perioperative Red Blood Cell Transfusion and the Development of Postoperative VTE Within 30 Days of a Surgical Procedure Using Multiple Imputation With Chained Equations

| <b>Adjusted Odds Ratio (95% CI) of VTE</b> |               |
|--------------------------------------------|---------------|
| <b>Perioperative RBC Transfusion</b>       |               |
| No                                         | 1 [Reference] |
| Yes                                        | 2.1 (2.0-2.3) |
| <b>Time of Perioperative Transfusion</b>   |               |
| None                                       | 1 [Reference] |
| Pre-operative only                         | 1.8 (1.5-2.2) |
| Intra/Postoperative only                   | 2.1 (1.9-2.2) |
| Pre- and Intra/Postoperative               | 2.8 (2.4-3.3) |

This was a sensitivity analysis using multiply imputed data and included all 750, 937 patients in the original sample. Separate multivariable models were used for each exposure-outcome relationship shown. Each multivariable model was adjusted for age, sex, race, body mass index, functional health status prior to surgery, the American Society of Anesthesiology (ASA) severity class, hospital length of stay, occurrence of sepsis, mechanical ventilation dependence, disseminated cancer, and work-related relative value units (as a surrogate for complexity of surgery). Data were derived from the American College of Surgeons' National Surgical Quality Improvement Database, 2014.

Abbreviations: VTE, venous thromboembolism

**eTable 3.** Characteristics of Participants in the Full Sample and the Propensity-Matched Subsample by Perioperative Red Blood Cell Transfusion Status

| Clinical Parameters                              | Original Sample          |                                   |                                   | Propensity-Matched Sample |                                  |                                   |
|--------------------------------------------------|--------------------------|-----------------------------------|-----------------------------------|---------------------------|----------------------------------|-----------------------------------|
|                                                  | Transfused<br>(n=47 410) | Non-<br>Transfused<br>(n=703 527) | Standardized<br>Difference<br>(%) | Transfused<br>(n=47 142)  | Non-<br>Transfused<br>(n=47 142) | Standardized<br>Difference<br>(%) |
| <b>Mean Age</b>                                  | 65.9                     | 55.6                              | 64.1                              | 65.8                      | 66.0                             | -0.8                              |
| <b>Male Sex<sup>a</sup></b>                      | 43.5                     | 43.2                              | 0.7                               | 43.5                      | 43.4                             | 0.1                               |
| <b>Race</b>                                      |                          |                                   |                                   |                           |                                  |                                   |
| White                                            | 71.8                     | 73.6                              | -4.1                              | 71.8                      | 71.9                             | -0.2                              |
| Black or African American                        | 13.1                     | 9.9                               | 10.1                              | 13.1                      | 13.0                             | 0.4                               |
| Asian                                            | 3.1                      | 2.8                               | 2.0                               | 3.1                       | 3.1                              | 0.1                               |
| Other                                            | 1.0                      | 1.1                               | -1.7                              | 0.1                       | 0.1                              | 0.7                               |
| Unknown                                          | 11.0                     | 12.6                              | -4.8                              | 11.0                      | 11.1                             | -0.4                              |
| <b>Body Mass Index</b>                           |                          |                                   |                                   |                           |                                  |                                   |
| Underweight                                      | 4.2                      | 1.5                               | 16.5                              | 4.2                       | 4.2                              | -0.2                              |
| Normal weight                                    | 31.0                     | 23.4                              | 17.2                              | 31.0                      | 31.3                             | -0.8                              |
| Overweight                                       | 28.8                     | 30.8                              | -4.3                              | 28.9                      | 28.8                             | 0.1                               |
| Class 1 Obesity                                  | 17.4                     | 20.9                              | -8.9                              | 17.4                      | 17.3                             | 0.3                               |
| Class 2 Obesity                                  | 8.3                      | 11.1                              | -9.3                              | 8.3                       | 8.4                              | -0.0                              |
| Class 3 Obesity                                  | 7.0                      | 10.4                              | -12.4                             | 7.0                       | 6.8                              | 0.7                               |
| Unknown                                          | 3.3                      | 1.9                               | 8.6                               | 3.2                       | 3.2                              | 0.3                               |
| <b>Functional Health Status Prior to Surgery</b> |                          |                                   |                                   |                           |                                  |                                   |
| Independent                                      | 89.2                     | 97.2                              | -32.4                             | 89.3                      | 89.3                             | 0.1                               |
| Partially dependent                              | 7.9                      | 1.7                               | 29.1                              | 7.8                       | 8.0                              | -0.7                              |
| Totally dependent                                | 2.0                      | 0.3                               | 15.6                              | 1.9                       | 1.9                              | 0.8                               |
| Unknown                                          | 0.9                      | 0.7                               | 2.4                               | 0.1                       | 0.1                              | 0.6                               |
| <b>ASA Class</b>                                 |                          |                                   |                                   |                           |                                  |                                   |
| 1-No Disturbance                                 | 1.1                      | 9.8                               | -39.0                             | 18.5                      | 18.6                             | -0.1                              |
| 2-Mild Disturbance                               | 18.4                     | 46.8                              | -63.4                             | 54.1                      | 54.3                             | -0.0                              |
| 3-Severe Disturbance                             | 53.8                     | 38.5                              | 31.1                              | 24.8                      | 24.9                             | -0.5                              |
| 4-Life Threatening                               | 24.8                     | 4.6                               | 59.5                              | 1.3                       | 0.1                              | -0.5                              |
| 5-Moribund                                       | 1.7                      | 0.1                               | 17.4                              | 0.2                       | 0.0                              | 4.4                               |
| Unknown                                          | 0.2                      | 0.3                               | -2.4                              | 0.2                       | 0.1                              | 0.8                               |
| <b>Hospital Length of Stay</b>                   |                          |                                   |                                   |                           |                                  |                                   |
| 0-1 day                                          | 2.8                      | 52.8                              | -134.7                            | 2.8                       | 2.4                              | 1.2                               |

|                                    |      |      |       |      |      |      |
|------------------------------------|------|------|-------|------|------|------|
| ≥2 days                            | 96.9 | 47.1 | 133.1 | 96.9 | 97.4 | -1.5 |
| Unknown                            | 0.4  | 0.1  | 6.5   | 0.3  | 0.2  | 2.5  |
| <b>Other Medical Complications</b> |      |      |       |      |      |      |
| Concurrence Sepsis                 | 6.1  | 1.5  | 24.3  | 6.0  | 5.8  | 1.0  |
| Ventilator Dependence              | 2.9  | 0.2  | 22.5  | 2.5  | 1.8  | 5.9  |
| Disseminated Cancer                | 7.8  | 2.0  | 27.0  | 7.8  | 8.0  | -0.9 |
| <b>Work Relative Value Units</b>   |      |      |       |      |      |      |
| Quartile 1                         | 5.4  | 26.5 | -60.0 | 5.5  | 5.4  | 0.2  |
| Quartile 2                         | 10.9 | 26.5 | -40.7 | 11.0 | 10.9 | 0.3  |
| Quartile 3                         | 32.2 | 24.3 | 17.8  | 32.3 | 32.8 | -1.0 |
| Quartile 4                         | 51.4 | 22.8 | 62.0  | 51.2 | 51.0 | 0.5  |

Data derived from American College of Surgeons' National Surgical Quality Improvement Database, 2014.

**eTable 4.** Association of Perioperative Red Blood Cell Transfusion and the Development of VTE Within 30 Days Postoperatively in Propensity-Matched Patient Groups Undergoing Surgical Procedures

| <b>Matched Odds Ratio (95% Confidence Interval)</b> |               |
|-----------------------------------------------------|---------------|
| <b>Perioperative RBC Transfusion</b>                |               |
| No                                                  | 1 [Reference] |
| Yes                                                 | 1.9 (1.8-2.1) |
| <b>Time of Perioperative Transfusion</b>            |               |
| None                                                | 1 [Reference] |
| Pre-operative only                                  | 1.6 (1.2-2.2) |
| Intra/Postoperative only                            | 1.9 (1.7-2.1) |
| Pre- and Intra/Postoperative                        | 2.3 (1.8-3.0) |

Include 47 142 propensity score-matched pairs. The matched odds ratio of developing postoperative VTE was estimated by a univariate conditional logistic regression model that included 47,142 propensity score-matched pairs. Estimation of the propensity score considered age, sex, race, body mass index, functional health status prior to surgery, the American Society of Anesthesiology (ASA) severity class, hospital length of stay, occurrence of sepsis, mechanical ventilation dependence, disseminated cancer, and work-related relative value units (as a surrogate for complexity of surgery) were included in the logistic regression model that estimated the propensity score.

**e-Figure.** Schema of Participants in the Original Sample and the Propensity-Matched Subsample

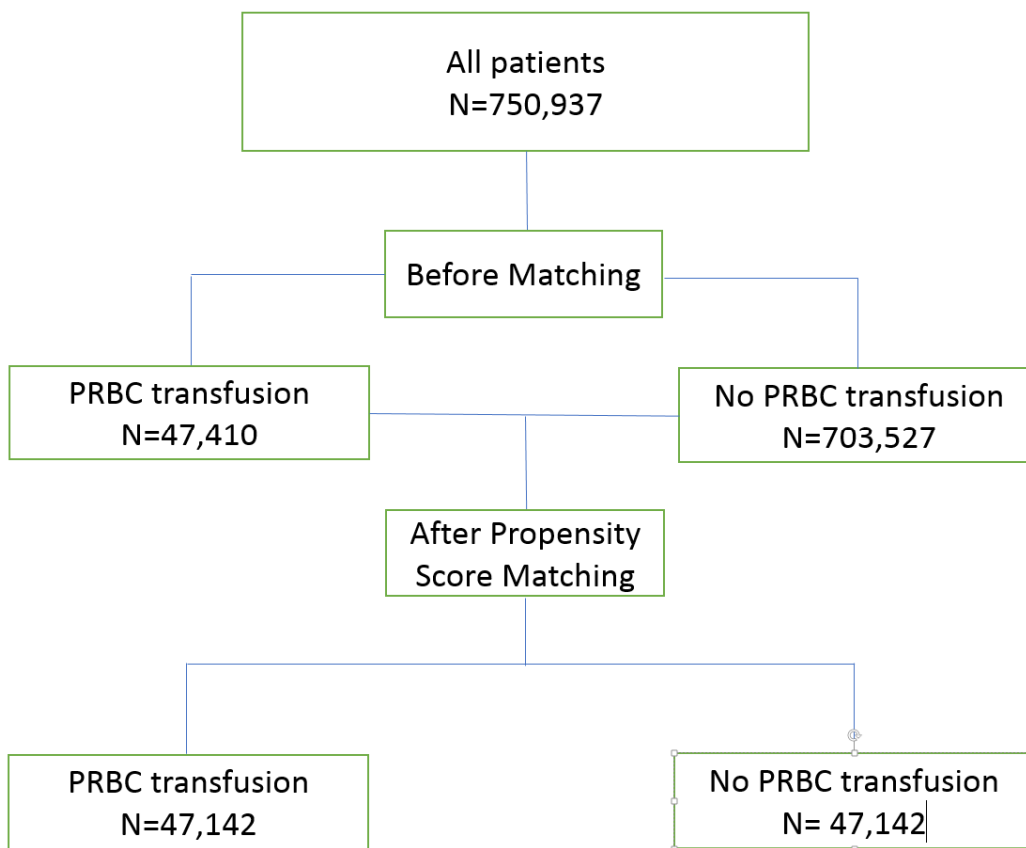

Supplement: jamasurg-153-826-s001.pdf [file jamasurg-153-826-s001.pdf]
